# Supplementary material for: Herbivore-Associated Bacteria as Potential Mediators and Modifiers of Induced Plant Defense Against Spider Mites and Thrips
Source: PubMed Central journal article supplement (PMC6077224; doi:10.3389/fpls.2018.01107), 2018-07-30
Supplement: Table_1.pdf [file Table_1.pdf]

**Table S1.** Endosymbiotic and gut/saliva bacteria documented in species of the spider mite family Tetranychidae (Acari, Trombidiformes) and the thrips family Thripidae (Insecta, Thysanoptera). References are not meant to be exhaustive.

| Herbivore                          | Bacteria<br>Class                                                                                 | Genus/species                                                                              | Localization <sup>1</sup> | References <sup>2,3</sup>                                                            |
|------------------------------------|---------------------------------------------------------------------------------------------------|--------------------------------------------------------------------------------------------|---------------------------|--------------------------------------------------------------------------------------|
| <b>Tetranychidae</b>               |                                                                                                   |                                                                                            |                           |                                                                                      |
| <i>Tetranychus urticae</i>         | $\alpha$ -Proteobacteria                                                                          | <i>Wolbachia</i>                                                                           | ES                        | a,b,c,e,f,g,h,i,k,m,n,<br>o,p,q,t,u,v,w,x,ab,aj,am<br><br>h,i,j,k,o,q,r,s,x,ab,ai,aj |
|                                    | Bacteroidetes                                                                                     | <i>Cardinium</i>                                                                           | ES                        |                                                                                      |
|                                    | Mollicutes                                                                                        | <i>Spiroplasma</i>                                                                         | ES                        | o,aj                                                                                 |
|                                    | $\alpha$ -Proteobacteria                                                                          | <i>Caulobacter</i>                                                                         | ES                        | m                                                                                    |
|                                    | $\alpha$ -Proteobacteria                                                                          | <i>Rickettsia</i>                                                                          | ES                        | m,ab,am                                                                              |
|                                    | $\gamma$ -Proteobacteria                                                                          | <i>Enterobacter</i>                                                                        | G/S                       | v                                                                                    |
|                                    | $\gamma$ -Proteobacteria                                                                          | <i>Pantoea</i>                                                                             | G/S                       | v                                                                                    |
|                                    | Bacilli                                                                                           | <i>Bacillus</i>                                                                            | G/S                       | v                                                                                    |
|                                    | $\gamma$ -Proteobacteria                                                                          | <i>Pseudomonas</i>                                                                         | G/S                       | v                                                                                    |
|                                    | $\alpha$ -Proteobacteria                                                                          | <i>Sphingomonas</i>                                                                        | G/S                       | v                                                                                    |
|                                    | $\beta$ -Proteobacteria                                                                           | <i>Herbaspirillum</i>                                                                      | G/S                       | v                                                                                    |
|                                    | Bacilli                                                                                           | <i>Staphylococcus</i>                                                                      | G/S                       | v                                                                                    |
|                                    | $\gamma$ -Proteobacteria                                                                          | <i>Pasteurella</i>                                                                         | G/S                       | v                                                                                    |
|                                    | $\gamma$ -Proteobacteria                                                                          | <i>Citrobacter</i>                                                                         | G/S                       | v                                                                                    |
|                                    | $\beta$ -Proteobacteria                                                                           | <i>Acidovorax</i>                                                                          | G/S                       | v,af                                                                                 |
|                                    | Flavobacteria                                                                                     | <i>Chryseobacterium</i>                                                                    | G/S                       | v                                                                                    |
|                                    | $\beta$ -Proteobacteria                                                                           | <i>Janthinobacterium</i>                                                                   | G/S                       | v                                                                                    |
|                                    | $\beta$ -Proteobacteria                                                                           | <i>Xenophilus</i>                                                                          | G/S                       | v                                                                                    |
|                                    |                                                                                                   | 101 OTUs in 33 families; mainly $\gamma$ -Proteob.<br>(Enterobacteriaceae, Pseudomonaceae) | G/S                       | aj<br>aj                                                                             |
|                                    | <i>T. evansi</i>                                                                                  | $\alpha$ -Proteobacteria                                                                   | <i>Wolbachia</i>          | ES                                                                                   |
| Bacteroidetes                      |                                                                                                   | <i>Cardinium</i>                                                                           | ES                        | am                                                                                   |
| $\alpha$ -Proteobacteria           |                                                                                                   | <i>Rickettsia</i>                                                                          | ES                        | am                                                                                   |
|                                    | 228 OTUs; mainly $\gamma$ -Proteobacteria incl.<br><i>Pseudomonas</i> and <i>Stenotrophomonas</i> | G/S                                                                                        | ah<br>ah                  |                                                                                      |
| <i>T. ludeni</i>                   | $\alpha$ -Proteobacteria                                                                          | <i>Wolbachia</i>                                                                           | ES                        | am                                                                                   |
|                                    | Bacteroidetes                                                                                     | <i>Cardinium</i>                                                                           | ES                        | am                                                                                   |
| <i>T. truncatus</i>                | $\alpha$ -Proteobacteria                                                                          | <i>Wolbachia</i>                                                                           | ES                        | q,y,aa,ab,ac,ae                                                                      |
|                                    | Bacteroidetes                                                                                     | <i>Cardinium</i>                                                                           | ES                        | y,ab,ae                                                                              |
|                                    | Mollicutes                                                                                        | <i>Spiroplasma</i>                                                                         | ES                        | y,ab,ac                                                                              |
| <i>T. kanzawai</i>                 | $\alpha$ -Proteobacteria                                                                          | <i>Wolbachia</i>                                                                           | ES                        | a,g,aa,ab                                                                            |
|                                    | Bacteroidetes                                                                                     | <i>Cardinium</i>                                                                           | ES                        | ab                                                                                   |
| <i>T. pueraricola</i>              | $\alpha$ -Proteobacteria                                                                          | <i>Wolbachia</i>                                                                           | ES                        | g,h,aa,ab                                                                            |
|                                    | Bacteroidetes                                                                                     | <i>Cardinium</i>                                                                           | ES                        | h,r                                                                                  |
| <i>T. phaselus</i>                 | $\alpha$ -Proteobacteria                                                                          | <i>Wolbachia</i>                                                                           | ES                        | aa,ab,ad                                                                             |
|                                    | Bacteroidetes                                                                                     | <i>Cardinium</i>                                                                           | ES                        | ab,ad                                                                                |
| <i>T. yusti</i>                    | $\alpha$ -Proteobacteria                                                                          | <i>Wolbachia</i>                                                                           | ES                        | a                                                                                    |
| <i>T. neocaledonicus</i>           | $\alpha$ -Proteobacteria                                                                          | <i>Wolbachia</i>                                                                           | ES                        | a                                                                                    |
| <i>T. piercei</i>                  | $\alpha$ -Proteobacteria                                                                          | <i>Wolbachia</i>                                                                           | ES                        | x,ab                                                                                 |
|                                    | Bacteroidetes                                                                                     | <i>Cardinium</i>                                                                           | ES                        | x,ab                                                                                 |
| <i>T. turkestanii</i>              | $\alpha$ -Proteobacteria                                                                          | <i>Wolbachia</i>                                                                           | ES                        | a,c                                                                                  |
| <i>T. parakanzawai</i>             | $\alpha$ -Proteobacteria                                                                          | <i>Wolbachia</i>                                                                           | ES                        | g                                                                                    |
| <i>Amphitetranychus viennensis</i> | $\alpha$ -Proteobacteria                                                                          | <i>Wolbachia</i>                                                                           | ES                        | q,ab                                                                                 |

|                                        |                          |                               |     |        |
|----------------------------------------|--------------------------|-------------------------------|-----|--------|
|                                        | Bacteroidetes            | <i>Cardinium</i>              | ES  | q,ab   |
| <i>A. quercivorus</i>                  | Bacteroidetes            | <i>Cardinium</i>              | ES  | h,r    |
| <i>Bryobia rubrioculus</i>             | $\alpha$ -Proteobacteria | <i>Wolbachia</i>              | ES  | d,p,u  |
|                                        | Bacteroidetes            | <i>Cardinium</i>              | ES  | p,u    |
| <i>B. praetiosa</i>                    | $\alpha$ -Proteobacteria | <i>Wolbachia</i>              | ES  | d,t,u  |
| <i>B. kissophila</i>                   | $\alpha$ -Proteobacteria | <i>Wolbachia</i>              | ES  | d,u    |
| <i>B. graminum</i>                     | $\alpha$ -Proteobacteria | <i>Wolbachia</i>              | ES  | d      |
| <i>B. neopraetiosa</i>                 | $\alpha$ -Proteobacteria | <i>Wolbachia</i>              | ES  | d      |
| <i>B. sarothamni</i>                   | $\alpha$ -Proteobacteria | <i>Wolbachia</i>              | ES  | s,t,u  |
|                                        | Bacteroidetes            | <i>Cardinium</i>              | ES  | s,t,u  |
| <i>B. berlesei</i>                     | $\alpha$ -Proteobacteria | <i>Wolbachia</i>              | ES  | u      |
| <i>Eotetranychus suginamensis</i>      | Bacteroidetes            | <i>Cardinium</i>              | ES  | h,r    |
| <i>E. uncatus</i>                      | Bacteroidetes            | <i>Cardinium</i>              | ES  | p      |
| <i>Eutetranychus orientalis</i>        | $\alpha$ -Proteobacteria | <i>Wolbachia</i>              | ES  | a      |
| <i>Oligonychus gotohi</i>              | $\alpha$ -Proteobacteria | <i>Wolbachia</i>              | ES  | g      |
| <i>O. ilicis</i>                       | Bacteroidetes            | <i>Cardinium</i>              | ES  | h,r    |
| <i>O. biharensis</i>                   | $\alpha$ -Proteobacteria | <i>Wolbachia</i>              | ES  | a      |
| <i>O. ununguis</i>                     | $\alpha$ -Proteobacteria | <i>Methylobacterium</i>       | G/S | ag     |
|                                        | Bacilli                  | <i>Bacillus thuringiensis</i> | G/S | ag     |
|                                        | Bacilli                  | <i>Bacillus cereus</i>        | G/S | ag     |
|                                        | Bacilli                  | <i>Staphyloc. chromogenes</i> | G/S | ag     |
|                                        | $\gamma$ -Proteobacteria | <i>Pseudomonas oleovorans</i> | G/S | ag     |
|                                        | Actinobacteria           | <i>Streptomyces</i>           | G/S | ag     |
|                                        | Bacilli                  | <i>Paenibacillus apiarius</i> | G/S | ag     |
|                                        | Actinobacteria           | <i>Mycobacterium</i>          | G/S | ag     |
| <i>Panonychus mori</i>                 | $\alpha$ -Proteobacteria | <i>Wolbachia</i>              | ES  | g      |
| <i>P. ulmi</i>                         | Bacteroidetes            | <i>Cardinium</i>              | ES  | z      |
| <i>Petrobia hartii</i>                 | $\alpha$ -Proteobacteria | <i>Wolbachia</i>              | ES  | i,ab   |
|                                        | Bacteroidetes            | <i>Cardinium</i>              | ES  | i,u,ab |
| <i>Schizotetranychus cercidiphylli</i> | $\alpha$ -Proteobacteria | <i>Wolbachia</i>              | ES  | g      |
| <i>Stigmaeopsis celarius</i>           | Bacteroidetes            | <i>Cardinium</i>              | ES  | r,ai   |
| <i>S. longus</i>                       | $\alpha$ -Proteobacteria | <i>Wolbachia</i>              | ES  | ai     |
|                                        | Bacteroidetes            | <i>Cardinium</i>              | ES  | r,ai   |
| <i>S. miscanthi</i>                    | Bacteroidetes            | <i>Cardinium</i>              | ES  | ak     |
|                                        | Mollicutes               | <i>Spiroplasma</i>            | ES  | ak     |
| <i>S. nanjingensis</i>                 | $\alpha$ -Proteobacteria | <i>Wolbachia</i>              | ES  | ai     |
| <b>Thripidae</b>                       |                          |                               |     |        |
| <i>Frankliniella occidentalis</i>      | $\gamma$ -Proteobacteria | <i>Erwinia</i>                | G/S | a      |
|                                        | $\gamma$ -Proteobacteria | Bfo-1 (Erwinia close)         | G/S | d,i    |
|                                        | $\gamma$ -Proteobacteria | Bfo-2 (Pantoea close)         | G/S | d,i    |
| <i>F. fusca</i>                        | $\gamma$ -Proteobacteria | <i>Pantoea ananatis</i>       | G/S | c,n    |
|                                        | $\gamma$ -Proteobacteria | <i>Pantoea agglomerans</i>    | G/S | c,n    |

|                                    |                                                       |                            |     |   |
|------------------------------------|-------------------------------------------------------|----------------------------|-----|---|
| <i>Aptinothrips rufus</i>          | $\alpha$ -Proteobacteria                              | <i>Wolbachia</i>           | ES  | h |
| <i>Caliothrips fasciatus</i>       | $\alpha$ -Proteobacteria                              | <i>Wolbachia</i>           | ES  | f |
| <i>Echinothrips americanus</i>     | $\alpha$ -Proteobacteria                              | <i>Wolbachia</i>           | ES  | e |
| <i>Heliothrips haemorrhoidalis</i> | $\alpha$ -Proteobacteria                              | <i>Wolbachia</i>           | ES  | k |
| <i>Pezothrips kellyanus</i>        | $\alpha$ -Proteobacteria                              | <i>Wolbachia</i>           | ES  | m |
|                                    | Bacteroidetes                                         | <i>Cardinium</i>           | ES  | m |
| <i>Sciothrips cardamomi</i>        | $\alpha$ -Proteobacteria                              | <i>Wolbachia</i>           | ES  | j |
| <i>Scirtothrips dorsalis</i>       | 189 genera , mainly Actinobacteria                    |                            | G/S | g |
|                                    | $\gamma$ -Proteobacteria and $\alpha$ -Proteobacteria |                            | G/S | g |
| <i>Suocerathrips linguis</i>       | $\alpha$ -Proteobacteria                              | <i>Wolbachia</i>           | ES  | e |
| <i>Thrips tabaci</i>               | $\gamma$ -Proteobacteria                              | <i>Erwinia</i>             | G/S | b |
|                                    | $\gamma$ -Proteobacteria                              | <i>Pantoea ananatis</i>    | G/S | o |
|                                    | $\gamma$ -Proteobacteria                              | <i>Pantoea agglomerans</i> | G/S | o |
| <i>T. palmi</i>                    | $\alpha$ -Proteobacteria                              | <i>Wolbachia</i>           | ES  | p |

<sup>1</sup>ES for intracellular endosymbionts; G/S for gut/saliva

<sup>2</sup>**References for Tetranychidae:** Breeuwer & Jacobs 1996<sup>a</sup>; Tsagarakou et al. 1996<sup>b</sup>; Breeuwer 1997<sup>c</sup>; Weeks & Breeuwer 2001<sup>d</sup>; Vala et al. 2002<sup>e</sup>, 2004<sup>f</sup>; Gotoh et al. 2003<sup>g</sup>, 2007<sup>h</sup>; Weeks et al. 2003<sup>i</sup>; Zchori-Fein & Perlman 2004<sup>j</sup>; Enigl et al. 2005<sup>k</sup>; Hoy & Jeyaprakash 2005<sup>m</sup>; Xie et al. 2006<sup>n</sup>, 2016<sup>o</sup>; Enigl & Schausberger 2007<sup>p</sup>; Chen et al. 2009<sup>q</sup>; Nakamura et al. 2009<sup>r</sup>; Ros & Breeuwer 2009<sup>s</sup>; Ros et al. 2009<sup>t</sup>, 2012<sup>u</sup>; Yoon et al. 2010<sup>v</sup>; Su et al. 2012<sup>w</sup>; Zhu et al. 2012<sup>x</sup>, 2018<sup>y</sup>; Zindel 2012<sup>z</sup>; Zhang et al. 2013<sup>aa</sup>, 2016<sup>ab</sup>, 2018<sup>ac</sup>; Zhao et al. 2013<sup>ad,ae</sup>; Choi et al. 2016<sup>af</sup>; Iskender & Aksu 2016<sup>ag</sup>; Knecht et al. 2017<sup>ah</sup>; Sakamoto et al. 2017<sup>ai</sup>; Staudacher et al. 2017<sup>aj</sup>; Sato et al. 2018<sup>ak</sup>; Zele et al. 2018<sup>am</sup>

<sup>3</sup>**References for Thripidae:** De Vries et al. 2001<sup>a</sup>, 2008<sup>b</sup>; Wells et al. 2002<sup>c</sup>; Chanbusarakum & Ullman 2008<sup>d</sup>; Kumm & Moritz 2008<sup>e</sup>; Rugman-Jones et al. 2012<sup>f</sup>; Dickey et al. 2014<sup>g</sup>; van der Kooij & Schwander 2014<sup>h</sup>; Facey et al. 2015<sup>i</sup>; Jacob et al. 2015<sup>j</sup>; Nguyen et al. 2015<sup>k</sup>, 2017<sup>m</sup>; Dutta et al. 2016<sup>a,b</sup>; Saurav et al. 2016<sup>p</sup>
